# Supplementary material for: High Expression of MicroRNA-196a is Associated with Progression of Hepatocellular Carcinoma in Younger Patients
Source: Cancers (Basel). 2019 Oct 13;11(10):1549. doi: 10.3390/cancers11101549 (PMC6826650; doi:10.3390/cancers11101549)
Supplement: Supplementary file 1 [file cancers-11-01549-s001.pdf]

## Supplementary Materials: High Expression of MicroRNA-196a is Associated with Progression of Hepatocellular Carcinoma in Younger Patients

Shen-Yung Wang, Chih-Li Chen, Yu-Chen Hu, Yi Chi, Yen-Hua Huang, Chien-Wei Su, Wen-Juei Jeng, Yuh-Jin Liang and Jaw-Ching Wu

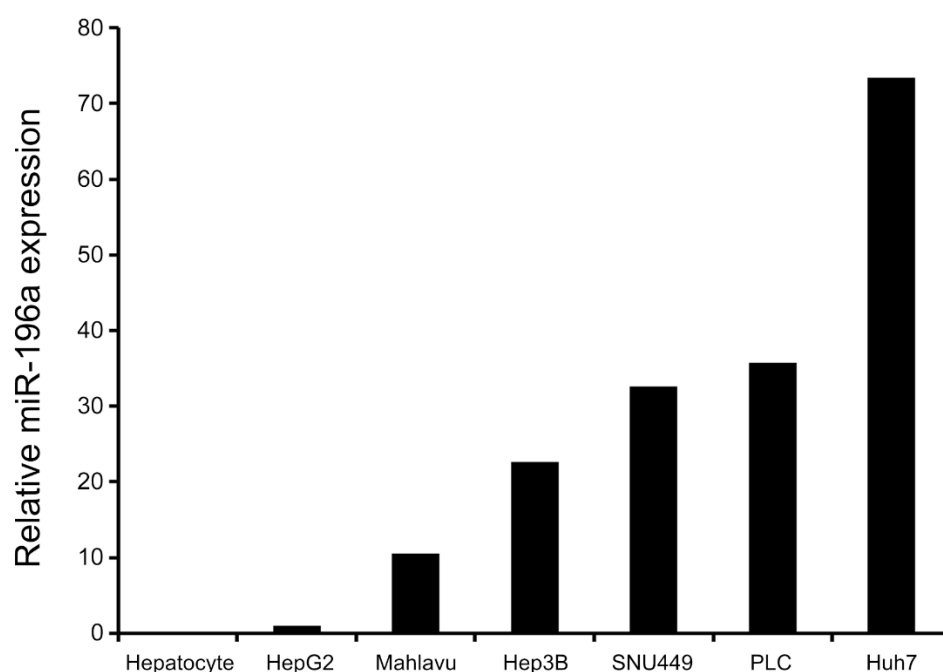

**Figure S1.** Relative expression of miR-196a in hepatocellular carcinoma cell lines. Relative expression of miR-196a in hepatocellular carcinoma cell lines, including HepG2, Mahlavu, Hep3B, SNU449, PLC, and Huh7. The expression was shown in levels relative to the lowest miR-196a expressed cell line, HepG2.

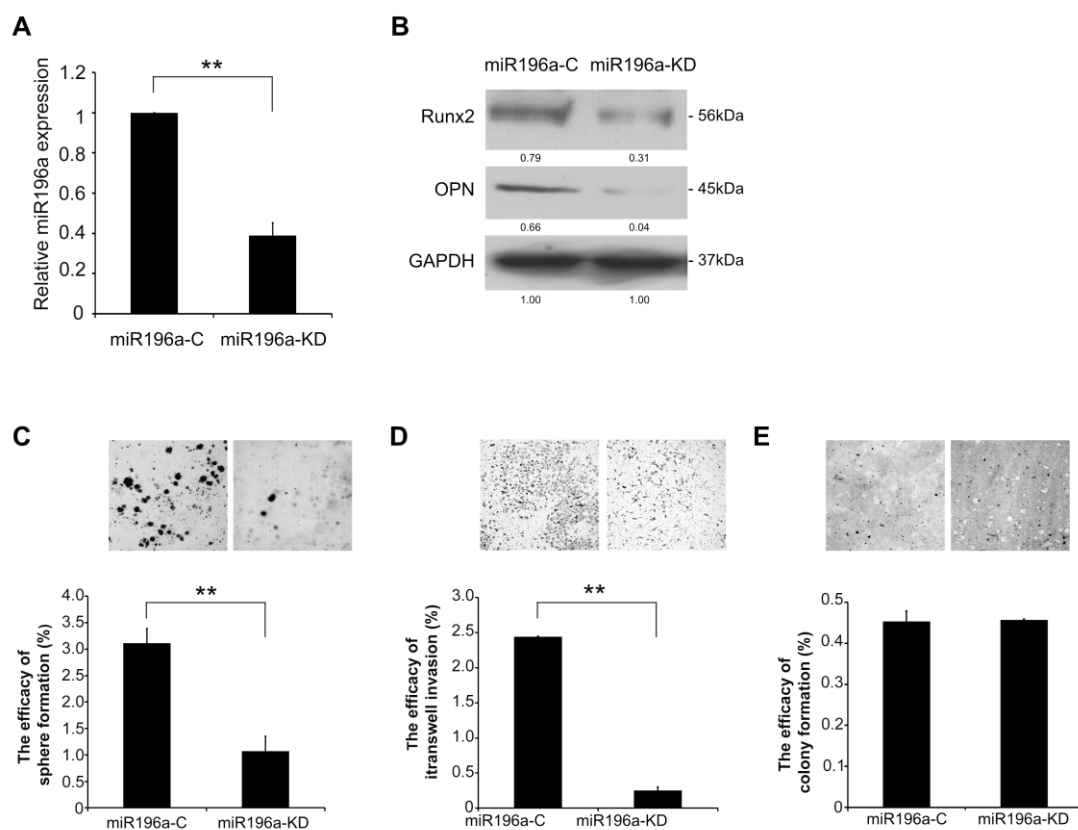

**Figure S2.** miR-196a is required for self-renewal and transwell invasion of SNU449 cells. (A) Downregulation of miR-196a after infection of lentiviral vectors expressing anti-sense miR-196a (miR-196a-KD) compared with that with negative control vectors (miR-196a-C) (\*\* $p < 0.01$ ). (B) Western blot showed that miR-196a downregulation resulted in a decrease of Runx2 and OPN. (C–E) Knockdown of miR-196a significantly decreased the sphere formation of (C) and invasiveness of (D) but not colony formation of SNU449 (E) (original magnification,  $\times 50$  (C),  $\times 100$  (D),  $\times 25$  (E), \*\* $p < 0.01$ ).

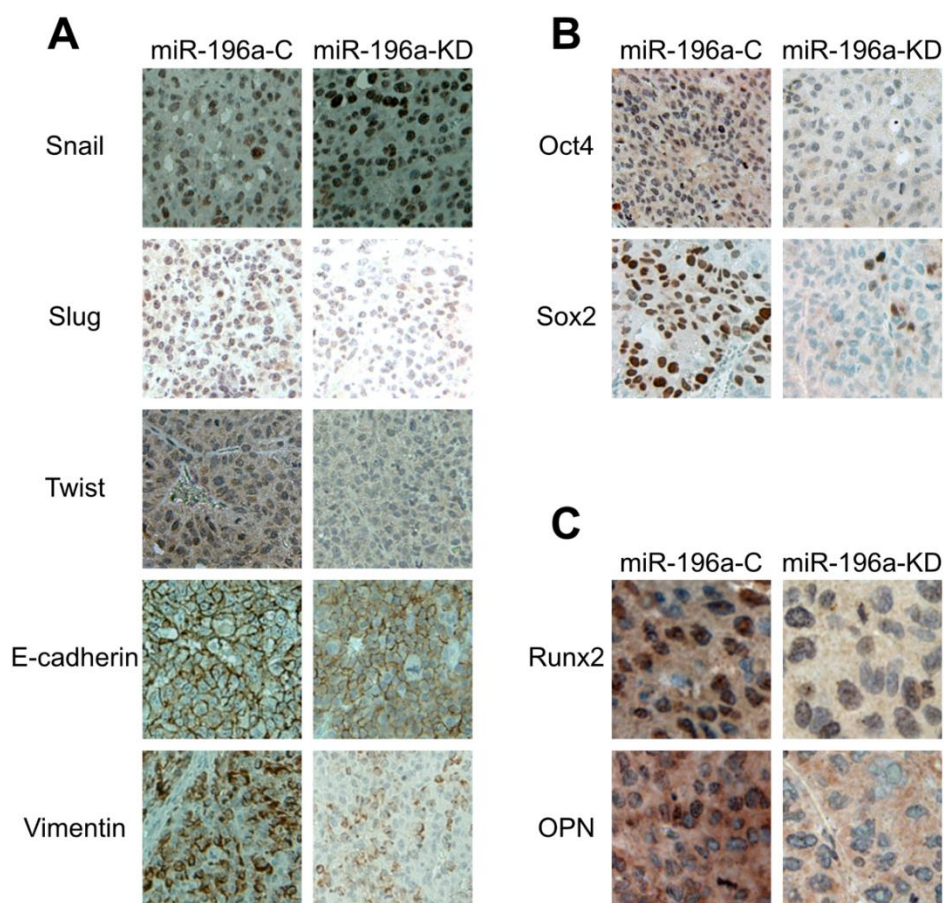

**Figure S3.** Higher magnification of the immunohistochemical staining pictures shown in Figure 4B (A), 4D (B) and 5B (C). Original magnification,  $\times 200$  (A),  $\times 200$  (B),  $\times 400$  (C).

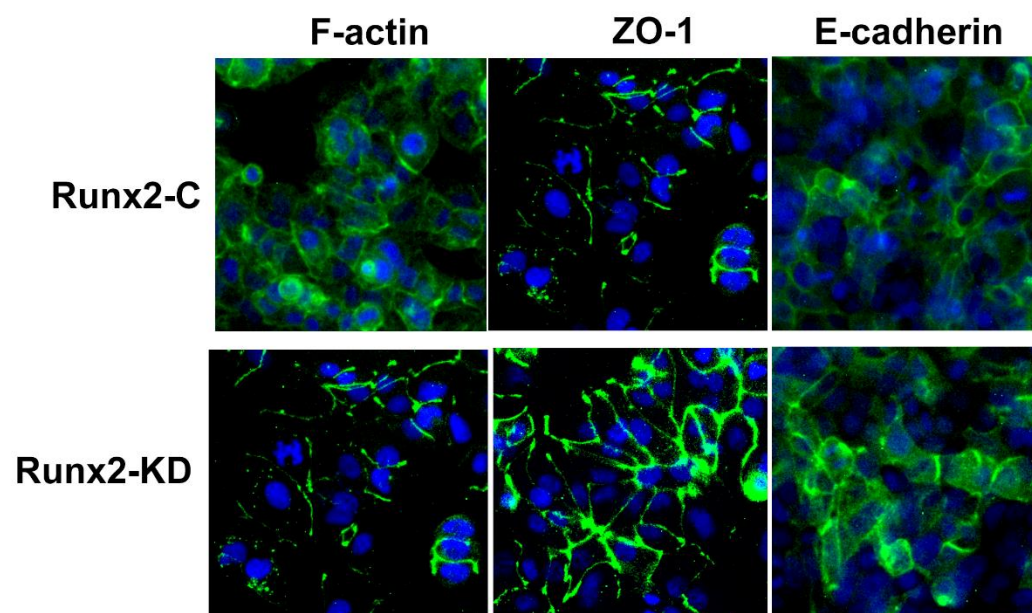

**Figure S4.** Runx2 downregulation alters cytoskeleton organization, ZO-1 localization, but not E-cadherin. Left: Knockdown of Runx2 (Runx2-KD) reduced stress fiber formation and actin staining in PLC cells. Middle: Runx2 downregulation resulted in higher expression of tight junction-associated protein ZO-1. Right: Expression and localization of E-cadherin were similar in PLC cells with or without Runx2 knockdown. Original magnification,  $\times 400$ .

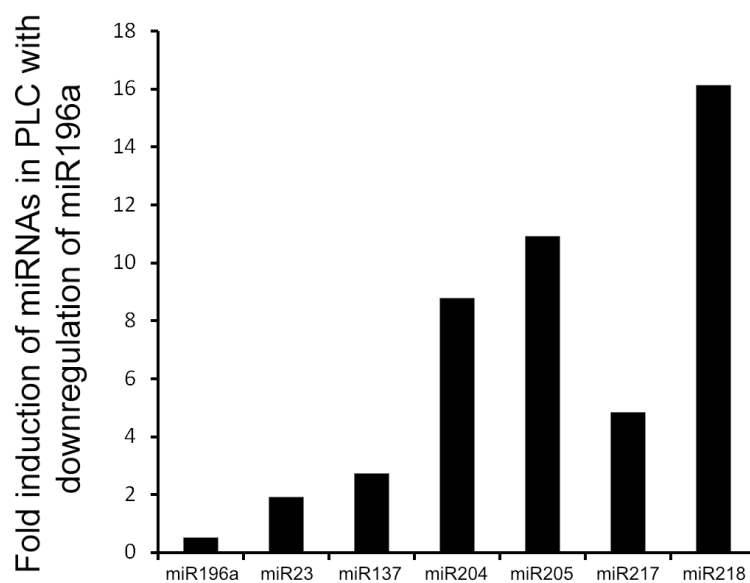

**Figure S5.** Knockdown of miR-196a is associated with an increased expression of the miRNAs targeting the 3'-UTR of Runx2 mRNA. Several miRNAs including miR-23, miR-137, miR-204, miR-205, miR-217, and miR-218 showed increased expression levels in miR-196a-downregulated PLC compared with those in the negative control.

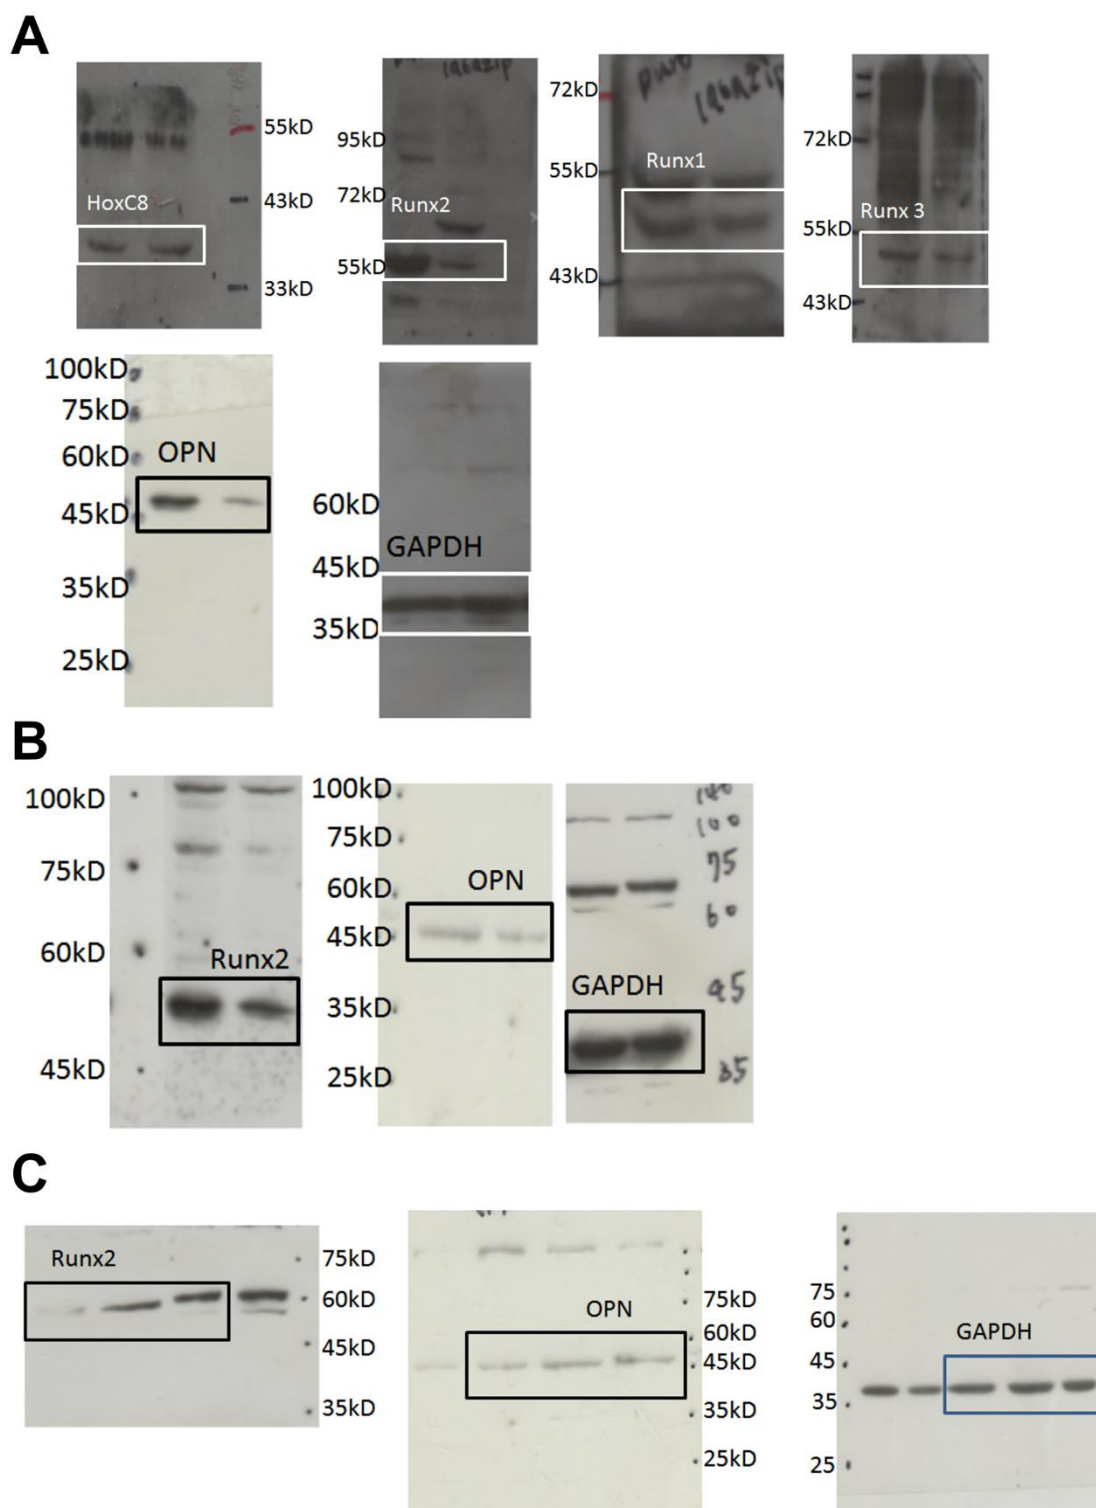

**Figure S6.** Uncropped Western blots corresponding to Figure 5A (A), 5C (B) and 6A (C).

**Table S1.** Correlation of recurrence with clinical, pathological and serological features of patients with hepatocellular carcinoma.

| Variable                             | Recurrence                                                               |                                                                          | <i>p</i> Value |
|--------------------------------------|--------------------------------------------------------------------------|--------------------------------------------------------------------------|----------------|
|                                      | Yes ( <i>n</i> = 43)                                                     | No ( <i>n</i> = 34)                                                      |                |
| Patient demographics                 |                                                                          |                                                                          |                |
| Age <sup>1</sup>                     | 50 (44–63.5)                                                             | 52.5 (44–64)                                                             | 0.955          |
| Male, No (%)                         | 36 (56.3)                                                                | 28 (43.8)                                                                | 1.0            |
| Cirrhosis, No (%)                    | 18 (41.9)                                                                | 14 (41.2)                                                                | 1.0            |
| Diabetes mellitus, No (%)            | 6 (14.0)                                                                 | 3 (8.8)                                                                  | 0.7349         |
| Serum biochemistries <sup>1</sup>    |                                                                          |                                                                          |                |
| Albumin (g/dL)                       | 3.95 (3.6–4.1)                                                           | 4.0 (3.7–4.2)                                                            | 0.5555         |
| ALT (IU/L)                           | 45.5 (33–65.8)                                                           | 38 (34–49)                                                               | 0.1552         |
| AST (IU/L)                           | 39.5 (32–61)                                                             | 36.5 (28.5–54)                                                           | 0.3315         |
| Total bilirubin (mg/dL)              | 0.8 (0.6–1.0)                                                            | 0.85 (0.63–1.08)                                                         | 0.386          |
| ALP (IU/L)                           | 89.5 (57.8–106.2)                                                        | 78.5 (65.3–107)                                                          | 0.9196         |
| Viral factors                        |                                                                          |                                                                          |                |
| HBeAg (Positive/Negative)            | 5/23                                                                     | 4/19                                                                     | 1.0            |
| HBV genotype (B/C)                   | 22/18                                                                    | 24/7                                                                     | 0.087          |
| HBV DNA (copies/ml) <sup>1</sup>     | 4.99 × 10 <sup>5</sup> (2.53 × 10 <sup>4</sup> –3.11 × 10 <sup>6</sup> ) | 9.16 × 10 <sup>4</sup> (1.02 × 10 <sup>4</sup> –1.62 × 10 <sup>6</sup> ) | 0.1532         |
| Tumor factors                        |                                                                          |                                                                          |                |
| Tumor size (cm) <sup>1</sup>         | 4.0 (2.75–8.25)                                                          | 4.15 (2.5–6.5)                                                           | 0.5307         |
| AFP (ng/mL), < 20 vs ≥ 20            | 17/24                                                                    | 16/18                                                                    | 0.8008         |
| Differentiation (Well/Moderate/Poor) | 1/26/6                                                                   | 1/25/8                                                                   | 0.5395         |
| HCC pattern (Solitary/Multiple)      | 32/11                                                                    | 28/6                                                                     | 0.5776         |
| Microvascular invasion (Yes/No)      | 22/21                                                                    | 8/26                                                                     | 0.0255         |
| Macrovascular invasion (Yes/No)      | 5/38                                                                     | 2/32                                                                     | 0.6371         |
| High miR-196a expression (Yes/No)    | 26/17                                                                    | 12/22                                                                    | 0.0495         |
| Tumor stage (I vs II + III + IV)     | 14/29                                                                    | 24/10                                                                    | 0.0020         |

<sup>1</sup> Data are presented with median and interquartile range. AFP: alpha-fetoprotein; ALP: alkaline phosphatase; ALT: alanine aminotransferase; AST: aspartate aminotransferase; HBV: hepatitis B virus; HCC: hepatocellular carcinoma.

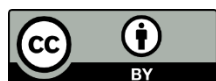

© 2019 by the authors. Licensee MDPI, Basel, Switzerland. This article is an open access article distributed under the terms and conditions of the Creative Commons Attribution (CC BY) license (<http://creativecommons.org/licenses/by/4.0/>).
